# Supplementary material for: The 'permeome' of the malaria parasite: an overview of the membrane transport proteins of Plasmodium falciparum
Source: Springer Nature journal article supplement (doi:10.1186/gb-2005-6-3-r26), 2005-03-02
Supplement: Additional file 2 [file gb-2005-6-3-r26-s2.pdf]

**Table 2: *P. falciparum* putative transport proteins: proteins that are related to 'hypothetical proteins' from other organisms and have predicted secondary structures that resemble those of characterised transport proteins, but which do not share sequence similarities with known or putative transport proteins and/or conserved domains of transport protein families.**

| GENE PRODUCT <sup>a</sup>                                         | CH <sup>b</sup> | ANNOTATION <sup>c</sup>   | SIZE <sup>d</sup> | TMD <sup>e</sup> | CLOSEST BLASTP HOMOLOGUE <sup>f</sup>                                                       | E <sup>g</sup>    | CONSERVED DOMAIN MATCH <sup>h</sup> |
|-------------------------------------------------------------------|-----------------|---------------------------|-------------------|------------------|---------------------------------------------------------------------------------------------|-------------------|-------------------------------------|
| PFE1130w                                                          | 5               | Hypothetical protein      | 483               | 9/10             | <i>A. thaliana</i> hypothetical protein (15231596; 5e <sup>-77</sup> to KOG2922).           | 4e <sup>-13</sup> | KOG2922 5e <sup>-17</sup>           |
| MAL6P1.277                                                        | 6               | Hypothetical protein      | 1096              | 11/10            | <i>C. elegans</i> hypothetical protein (17554238; 0.0 to KOG2365).                          | 7e <sup>-16</sup> | KOG2365 8e <sup>-12</sup>           |
| MAL6P1.292                                                        | 6               | Integral membrane protein | 1347              | 7/8              | <i>M. musculus</i> integral membrane protein (31981342; 2.8e <sup>-141</sup> to Pfam06762). | 3e <sup>-29</sup> | Pfam06762 2e <sup>-21</sup>         |
| MAL8P1.30                                                         | 8               | Hypothetical protein      | 643               | 10/11            | <i>M. musculus</i> integral membrane protein (31981342).                                    | 7e <sup>-10</sup> | No matches                          |
| MAL8P1.135                                                        | 8               | Hypothetical protein      | 965               | 9/11             | <i>H. sapien</i> hypothetical protein (37538400; 0.0 to KOG4587).                           | 2e <sup>-19</sup> | KOG4587 1e <sup>-06</sup>           |
| PFL2410w*                                                         | 12              | Hypothetical protein      | 1039              | 9/10             | <i>R. norvegicus</i> integral membrane protein (34867474; 3e <sup>-62</sup> to KOG1134).    | 1e <sup>-19</sup> | KOG1134 6e <sup>-15</sup>           |
| PF13_0172*                                                        | 13              | Hypothetical protein      | 522               | 11/10            | <i>A. thaliana</i> hypothetical protein (15237867; .2e <sup>-222</sup> to Pfam 05684).      | 2e <sup>-05</sup> | Pfam05684 1e <sup>-09</sup>         |
| <b>APICOMPLEXA-SPECIFIC FAMILY OF PUTATIVE TRANSPORT PROTEINS</b> |                 |                           |                   |                  |                                                                                             |                   |                                     |
| PFB0770c                                                          | 2               | Hypothetical protein      | 1122              | 15/15            | <i>C. parvum</i> hypothetical protein (46227024; no matches).                               | 2e <sup>-26</sup> | No matches                          |
| PF11205c                                                          | 9               | Hypothetical protein      | 1249              | 13/12            | <i>C. parvum</i> hypothetical protein (46227024; no matches).                               | 2e <sup>-07</sup> | No matches                          |

<sup>a-h,\*</sup> as described in Additional data file 1.
