# Supplementary material for: The 'permeome' of the malaria parasite: an overview of the membrane transport proteins of Plasmodium falciparum
Source: Springer Nature journal article supplement (doi:10.1186/gb-2005-6-3-r26), 2005-03-02
Supplement: Additional file 3 [file gb-2005-6-3-r26-s3.pdf]

**Table 3: *P. falciparum* putative transport proteins: *Plasmodia*-specific proteins that have the (predicted) structural characteristics of a transporter, but which, apart from strong sequence similarities to hypothetical proteins from other *Plasmodia* species, do not display any similarities to proteins or conserved domains in the current databases.** These proteins do have, to varying degrees, predicted secondary structures that are similar to those of characterised transport proteins, which suggests that these novel proteins might function as transporters.

| GENE PRODUCT <sup>a</sup> | CH <sup>b</sup> | ANNOTATION <sup>c</sup> | SIZE <sup>d</sup> | TMD <sup>e</sup> | DESCRIPTION                                                                                                                                                                                                                              |
|---------------------------|-----------------|-------------------------|-------------------|------------------|------------------------------------------------------------------------------------------------------------------------------------------------------------------------------------------------------------------------------------------|
| PFC0240c                  | 3               | Hypothetical protein    | 955               | 11               | The TMDs of PFC0240c are arranged as 2 clusters, one of 5 and the other of 6, which are separated by a hydrophilic loop. The N-terminal hydrophilic tail is long (~400 residues in length).                                              |
| PFC0685w                  | 3               | Hypothetical protein    | 913               | 12/14            | The TMDs of PFC0685w are arranged, from N- to C-terminus, as clusters of 3, 4, 1, 4 and 2. The longest hydrophilic loop is between TMDs 8 and 9 (~200 residues in length), the other inter-cluster loops are 60 - 80 residues in length. |
| PFE1525w*                 | 5               | Hypothetical protein    | 970               | 10               | The leading TMD of the PFE1525w protein is separated from the remaining 9 TMDs by a hydrophilic loop of ~175 residues and the C-terminal tail is long (~300 residues in length).                                                         |
| MAL6P1.144                | 6               | Hypothetical protein    | 360               | 8                | The TMDs of MAL6P1.144 are in clusters of 2. Unlike most other proteins analysed in this study, MAL6P1.144 does not have an orthologue in <i>P. yoelii</i> .                                                                             |
| PF11_0363                 | 11              | Hypothetical protein    | 409               | 8                | The TMDs of PF11_0363 are arranged, from N- to C-terminus, as clusters of 1, 2, 2, 2 and 1.                                                                                                                                              |

<sup>a-e,\*</sup> as described in Additional data file 1.
