# Supplementary material for: The 'permeome' of the malaria parasite: an overview of the membrane transport proteins of Plasmodium falciparum
Source: PubMed Central journal article supplement (PMC1088945; doi:10.1186/gb-2005-6-3-r26), 2005-03-02
Supplement: gb-2005-6-3-r26-S1.pdf [file gb-2005-6-3-r26-S1.pdf]

**Table 1: *P. falciparum* putative transport proteins: proteins that share sequence similarities with known or putative transport proteins and/or conserved domains of transport protein families.**

| GENE PRODUCT <sup>a</sup>                                                                                                                            | CH <sup>b</sup> | ANNOTATION <sup>c</sup>                                 | SIZE <sup>d</sup> | TMD <sup>e</sup> | CLOSEST BLASTP HOMOLOGUE <sup>f</sup>                                                                                                                                                                      | E <sup>g</sup>       | CONSERVED DOMAIN MATCH <sup>h</sup>                        | PUTATIVE FUNCTION <sup>i</sup>     |
|------------------------------------------------------------------------------------------------------------------------------------------------------|-----------------|---------------------------------------------------------|-------------------|------------------|------------------------------------------------------------------------------------------------------------------------------------------------------------------------------------------------------------|----------------------|------------------------------------------------------------|------------------------------------|
| <b>MAJOR FACILITATOR SUPERFAMILY (TC 2.A.1)</b>                                                                                                      |                 |                                                         |                   |                  |                                                                                                                                                                                                            |                      |                                                            |                                    |
| PFL0170w                                                                                                                                             | 12              | Hypothetical protein                                    | 1250              | 12               | Although PFL0170w does not have a sequence homologue in the current databases, it does display some structural similarity to the MFS proteins.                                                             | -                    | Pfam00083 0.028 (p)                                        | Transporter                        |
| <b>SUGAR PORTER FAMILY (TC 2.A.1.1; PFAM00083)</b>                                                                                                   |                 |                                                         |                   |                  |                                                                                                                                                                                                            |                      |                                                            |                                    |
| PFB0210c                                                                                                                                             | 2               | Monosaccharide transporter, putative                    | 504               | 12               | <i>T. gondii</i> facilitative glucose transporter (21630202; 1.7e <sup>-86</sup> to Pfam00083).                                                                                                            | 1.3e <sup>-105</sup> | Pfam00083 7.5e <sup>-92</sup>                              | Hexose transporter 1 (PfHT1; [46]) |
| PFI0955w                                                                                                                                             | 9               | Sugar transporter, putative                             | 476               | 11/12            | <b>PFB0210c PfHT1</b> (23613713).                                                                                                                                                                          | 3e <sup>-28</sup>    | Pfam00083 8e <sup>-12</sup>                                | Sugar transporter                  |
| PFI0785c                                                                                                                                             | 9               | Transporter, putative                                   | 1379              | 11/13            | <i>C. parvum</i> putative MFS protein (46229527; 7e <sup>-05</sup> to Pfam00083).                                                                                                                          | 4e <sup>-40</sup>    | Pfam00083 1e <sup>-05</sup>                                | Sugar transporter                  |
| <b>DRUG:H<sup>+</sup> ANTIporter-1 FAMILY (TC 2.A.1.2; COG2814)</b>                                                                                  |                 |                                                         |                   |                  |                                                                                                                                                                                                            |                      |                                                            |                                    |
| PFB0275w                                                                                                                                             | 2               | Membrane transporter<br>Hypothetical protein, conserved | 565               | 11               | <i>A. thaliana</i> putative transporter (15234530; 1e <sup>-119</sup> to KOG1330 and 6e <sup>-07</sup> to COG2814).                                                                                        | 9e <sup>-59</sup>    | KOG1330 2e <sup>-25</sup><br>COG2814 25e <sup>-09</sup>    | Metabolite/drug transporter        |
| PF11_0059*                                                                                                                                           | 11              | Hypothetical protein                                    | 417               | 9                | <i>P. luminescens</i> putative multidrug resistance transporter (36787367; 3e <sup>-14</sup> to COG2814)                                                                                                   | 9.9e <sup>-04</sup>  | Pfam00083 0.002 (p)                                        | Metabolite/drug transporter        |
| PF14_0260                                                                                                                                            | 14              | Hypothetical protein                                    | 809               | 12/11            | <b>PFB0275w</b> (23593282).                                                                                                                                                                                | 4.6e <sup>-22</sup>  | COG2814 8e <sup>-04</sup>                                  | Metabolite/drug transporter        |
| PF14_0387                                                                                                                                            | 14              | Hypothetical protein                                    | 582               | 12               | <i>G. violaceus</i> putative tetracycline resistance protein (37521059; 8e <sup>-09</sup> to COG2814).                                                                                                     | 3e <sup>-07</sup>    | COG2814 1e <sup>-11</sup>                                  | Metabolite/drug transporter        |
| FullPhat                                                                                                                                             |                 |                                                         |                   |                  |                                                                                                                                                                                                            |                      |                                                            |                                    |
| PFE0825w                                                                                                                                             | 5               | Transporter, putative                                   | 440               | 10/11            | <i>M. musculus</i> putative organic cation transporter (6679180; 1e <sup>-05</sup> to KOG2615).                                                                                                            | 2.1e <sup>-23</sup>  | KOG2615 0.003 (p)                                          | Metabolite/drug transporter        |
| <b>MONOCARBOXYLATE PORTER FAMILY (TC 2.A.1.13; KOG2504, PFAMB252, PFAMB1302)/ OXALATE:FORMATE ANTIporter FAMILY (TC 2.A.1.11; KOG2504, PFAMB252)</b> |                 |                                                         |                   |                  |                                                                                                                                                                                                            |                      |                                                            |                                    |
| PFB0465c                                                                                                                                             | 2               | Membrane transporter<br>Hypothetical protein            | 457               | 12/11            | <i>C. briggsae</i> hypothetical protein (39587811; 4e <sup>-33</sup> to KOG2504, 3.5e <sup>-09</sup> to PfamB252 and 4.7e <sup>-06</sup> to PfamB1302).                                                    | 1e <sup>-34</sup>    | PfamB252 2.8e <sup>-38</sup><br>KOG2504 2e <sup>-16</sup>  | Monocarboxylate transporter        |
| PFI1295c                                                                                                                                             | 9               | Membrane transporter, putative                          | 612               | 11/12            | <b>PFB0465c</b> (16804992).                                                                                                                                                                                | 6e <sup>-30</sup>    | KOG2504 2e <sup>-09</sup><br>PfamB252 8.3e <sup>-08</sup>  | Monocarboxylate transporter        |
| GeneFinder                                                                                                                                           |                 |                                                         |                   |                  |                                                                                                                                                                                                            |                      |                                                            |                                    |
| <b>PEPTIDE-ACETYL-COENZYME A TRANSPORTER FAMILY (TC 2.A.1.25; KOG3574)</b>                                                                           |                 |                                                         |                   |                  |                                                                                                                                                                                                            |                      |                                                            |                                    |
| PF10_0360                                                                                                                                            | 10              | Hypothetical protein                                    | ~579              | 9/11             | <i>A. gambiae</i> hypothetical protein (31199731; 4e <sup>-153</sup> to KOG3574). Chr10.gen_231 appears to contain ORFs for 3 different proteins, amino acid residues 1644-2222 were used in our analysis. | 1e <sup>-61</sup>    | KOG3574 3e <sup>-69</sup>                                  | Acetyl-CoA transporter             |
| GeneFinder                                                                                                                                           |                 |                                                         |                   |                  |                                                                                                                                                                                                            |                      |                                                            |                                    |
| <b>GLYCOSIDE-PENTOSIDE-HEXURONIDE:CATION SYMPORTER FAMILY (TC 2.A.2; COG2211)<sup>§</sup></b>                                                        |                 |                                                         |                   |                  |                                                                                                                                                                                                            |                      |                                                            |                                    |
| PFE1455w                                                                                                                                             | 5               | Sugar transporter, putative                             | 548               | 12               | <i>C. aurantiacus</i> hypothetical protein (22972266; 4e <sup>-90</sup> to COG2211).                                                                                                                       | 9e <sup>-20</sup>    | COG2211 1e <sup>-30</sup>                                  | Sugar: cation symporter            |
| <b>ORGANO ANION TRANSPORTER FAMILY (TC 2.A.60; Pfam03132, KOG3626)<sup>§</sup></b>                                                                   |                 |                                                         |                   |                  |                                                                                                                                                                                                            |                      |                                                            |                                    |
| MAL6P1.283                                                                                                                                           | 6               | Hypothetical protein                                    | 853               | 12               | <i>A. thaliana</i> hypothetical protein (4314370; 7e <sup>-107</sup> to KOG1330 and 3e <sup>-11</sup> to KOG3626).                                                                                         | 1.9e <sup>-08</sup>  | Pfam03132 7.8e <sup>-05</sup><br>KOG1330 1e <sup>-07</sup> | Organic anion transporter          |
| <b>FOLATE-BIOPTERIN TRANSPORTER FAMILY (TC 2.A.71; PFAM03092)<sup>§</sup></b>                                                                        |                 |                                                         |                   |                  |                                                                                                                                                                                                            |                      |                                                            |                                    |
| MAL8P1.13                                                                                                                                            | 8               | Integral membrane protein, conserved                    | 505               | 12               | <b>PF11_0172</b> (23508363).                                                                                                                                                                               | 8e <sup>-50</sup>    | Pfam03092 3.9e <sup>-35</sup>                              | Folate/biopterin transporter       |
| PF10_0215                                                                                                                                            | 10              | Hypothetical protein                                    | 629               | 12/11            | <i>T. elongatus</i> hypothetical protein (22297560; 2.8e <sup>-164</sup> to Pfam03092).                                                                                                                    | 6e <sup>-04</sup>    | Pfam03092 0.079 (p)                                        | Metabolite/vitamin transporter     |
| GlimmerM                                                                                                                                             |                 |                                                         |                   |                  |                                                                                                                                                                                                            |                      |                                                            |                                    |
| PF11_0172                                                                                                                                            | 11              | Hypothetical protein, conserved                         | 455               | 11               | <i>C. parvum</i> putative biopterin transporter (32398782; 4.2e <sup>-56</sup> to Pfam03092).                                                                                                              | 7e <sup>-95</sup>    | Pfam03092 7.8e <sup>-44</sup>                              | Folate/biopterin transporter       |
| <b>NOVEL PUTATIVE TRANSPORTER FAMILY</b>                                                                                                             |                 |                                                         |                   |                  |                                                                                                                                                                                                            |                      |                                                            |                                    |
| PFA0240w                                                                                                                                             | 1               | Hypothetical protein                                    | 711               | 12/11            | <b>PFA0245w</b> (23613408).                                                                                                                                                                                | 4.9e <sup>-59</sup>  | No matches                                                 | Transporter                        |
| PFA0245w                                                                                                                                             | 1               | Hypothetical protein                                    | 577               | 12               | <b>PF11_0310</b> (23508501).                                                                                                                                                                               | 2e <sup>-28</sup>    | KOG0569 0.008 (p)                                          | Transporter                        |
| PFC0530w                                                                                                                                             | 3               | Hypothetical protein                                    | 579               | 12/11            | <b>PFA0245w</b> (23613408).                                                                                                                                                                                | 3.5e <sup>-07</sup>  | No matches                                                 | Transporter                        |
| PFI0720w                                                                                                                                             | 9               | Hypothetical protein                                    | 516               | 11               | <b>PFA0245w</b> (23613408).                                                                                                                                                                                | 5e <sup>-15</sup>    | No matches                                                 | Transporter                        |
| PF11_0310                                                                                                                                            | 11              | Hypothetical protein                                    | 609               | 12               | <b>PFA0240w</b> (23513407).                                                                                                                                                                                | 1.1e <sup>-34</sup>  | No matches                                                 | Transporter                        |

|                                                                                          |    |                                                                        |      |       |                                                                                                                         |                     |                                                                                                   |
|------------------------------------------------------------------------------------------|----|------------------------------------------------------------------------|------|-------|-------------------------------------------------------------------------------------------------------------------------|---------------------|---------------------------------------------------------------------------------------------------|
| <b>ZINC (Zn<sup>2+</sup>)-IRON (Fe<sup>2+</sup>) PERMEASE FAMILY (TC 2.A.5; KOG1558)</b> |    |                                                                        |      |       |                                                                                                                         |                     |                                                                                                   |
| MAL6P1.94                                                                                | 6  | Transporter protein, putative                                          | 361  | 8     | <i>D. melanogaster</i> hypothetical protein (24586056; 1e <sup>-58</sup> to KOG1558).                                   | 1e <sup>-10</sup>   | KOG1558 1e <sup>-13</sup> Zn <sup>2+</sup> or Fe <sup>2+</sup> permease                           |
| <b>RESISTANCE-NODULATION-CELL DIVISION SUPERFAMILY (TC 2.A.6; COG1033)</b>               |    |                                                                        |      |       |                                                                                                                         |                     |                                                                                                   |
| <b>EUKARYOTIC (PUTATIVE) STEROL TRANSPORTER FAMILY (TC 2.A.6.6; KOG1934)</b>             |    |                                                                        |      |       |                                                                                                                         |                     |                                                                                                   |
| PFA0375c                                                                                 | 1  | Patched family protein, putative                                       | 1470 | 12    | <i>C. parvum</i> putative patched family protein (46227691; 3e <sup>-56</sup> to KOG1934).                              | 1e <sup>-38</sup>   | KOG1934 2e <sup>-41</sup> Lipid/sterol:H <sup>+</sup> symporter                                   |
| <b>DRUG/METABOLITE TRANSPORTER SUPERFAMILY (TC 2.A.7; PFAM00892, KOG3912)</b>            |    |                                                                        |      |       |                                                                                                                         |                     |                                                                                                   |
| PF07_0070                                                                                | 7  | Transporter/permease protein, putative                                 | 322  | 9     | <i>G. lamblia</i> hypothetical protein (29247301; 4e <sup>-07</sup> to KOG3912).                                        | 9e <sup>-20</sup>   | KOG3912 3e <sup>-04</sup> Drug/metabolite transporter<br>Pfam00892 0.008 (p)                      |
| PFE0785c                                                                                 | 5  | Hypothetical protein                                                   | 456  | 10    | <i>D. discoideum</i> putative GDP-fucose: GMP antiporter (28828290; 5e <sup>-62</sup> to KOG1442).                      | 2e <sup>-04</sup>   | No matches Drug/metabolite transporter                                                            |
| <b>TRIOSE-PHOSPHATE TRANSPORTER FAMILY (TC 2.A.7.9; KOG1441, KOG1443)</b>                |    |                                                                        |      |       |                                                                                                                         |                     |                                                                                                   |
| PFE0410w*                                                                                | 5  | Triose- or hexose-P <sub>i</sub> ; P <sub>i</sub> antiporter, putative | 342  | 9     | <i>P. sativum</i> chloroplast triose-P <sub>i</sub> ; P <sub>i</sub> antiporter (117290; 2e <sup>-46</sup> to KOG1441). | 1e <sup>-47</sup>   | KOG1441 4e <sup>-29</sup> Triose- or hexose-P <sub>i</sub> ;P <sub>i</sub> antiporter             |
| PFE1510c*                                                                                | 5  | Phosphoenolpyruvate: P <sub>i</sub> antiporter, putative               | 524  | 7/8   | <b>PFE0410w</b> (2361306).                                                                                              | 3e <sup>-44</sup>   | KOG1441 1e <sup>-30</sup> Phosphoenolpyruvate:P <sub>i</sub> antiporter                           |
| PFL0890c                                                                                 | 12 | Hypothetical protein                                                   | 491  | 10    | <i>S. bicolor</i> putative phosphoenolpyruvate: phosphate antiporter (18481711; 7e <sup>-40</sup> to KOG1441).          | 5e <sup>-13</sup>   | KOG1443 6e <sup>-06</sup> Triose- or hexose-P <sub>i</sub> ;P <sub>i</sub> antiporter             |
| <b>GDP-MANNOSE: GMP ANTIPORTER FAMILY (TC 2.A.7.13; KOG1442)</b>                         |    |                                                                        |      |       |                                                                                                                         |                     |                                                                                                   |
| PFB0535w<br>gi:7494384                                                                   | 2  | Probable multiple-TM membrane protein<br>Hypothetical protein          | 311  | 7/8   | <i>R. norvegicus</i> putative GDP-fucose: GMP antiporter (34856560; 1e <sup>-136</sup> to KOG1442).                     | 2e <sup>-16</sup>   | KOG1442 9e <sup>-08</sup> GDP-fucose:GMP antiporter                                               |
| <b>UDP-N-ACETYL GLUCOSAMINE: UMP ANTIPORTER FAMILY (TC 2.A.7.10; KOG2234)</b>            |    |                                                                        |      |       |                                                                                                                         |                     |                                                                                                   |
| PFE0260w                                                                                 | 5  | Hypothetical protein                                                   | 611  | 9/10  | <i>R. norvegicus</i> putative NDP-sugar: NMP antiporter (34859909; 8e <sup>-104</sup> to KOG2234).                      | 3e <sup>-10</sup>   | KOG2234 4e <sup>-11</sup> UDP-N-acetyl glucosamine:UMP antiporter                                 |
| <b>UDP-GALACTOSE: UMP ANTIPORTER FAMILY (TC 2.A.7.11; KOG1581)</b>                       |    |                                                                        |      |       |                                                                                                                         |                     |                                                                                                   |
| PF11_0141                                                                                | 11 | UDP-galactose transporter, putative                                    | 343  | 8/9   | <i>R. prolixus</i> putative UDP-galactose: UMP antiporter (33518713; 8e <sup>-48</sup> to KOG1581).                     | 3e <sup>-33</sup>   | KOG1581 3e <sup>-36</sup> UDP-galactose:UMP antiporter                                            |
| <b>10 TMS DRUG/METABOLITE EXPORTER FAMILY (TC 2.A.7.3; COG0697, PFAM00892, KOG3912)</b>  |    |                                                                        |      |       |                                                                                                                         |                     |                                                                                                   |
| PF07_0064                                                                                | 7  | Hypothetical protein                                                   | 434  | 9/10  | <i>B. anthracis</i> putative transporter (30260969; 3e <sup>-08</sup> to Pfam00892).                                    | 2e <sup>-13</sup>   | COG0697 1e <sup>-08</sup> Drug/metabolite exporter                                                |
| MAL7P1.27                                                                                | 7  | Chloroquine resistance transporter, putative                           | 424  | 10    | <i>C. parvum</i> putative transporter (32399066; Pfam00892 0.049 (p)).                                                  | 1e <sup>-25</sup>   | KOG3912 4e <sup>-04</sup> Chloroquine resistance transporter (PfCRT; [17, 19])                    |
| <b>AMINO ACID/AUXIN PERMEASE FAMILY (TC 2.A.18; PFAM01490)</b>                           |    |                                                                        |      |       |                                                                                                                         |                     |                                                                                                   |
| MAL6P1.133                                                                               | 6  | Transmembrane amino acid transporter protein, putative                 | 606  | 9/11  | <i>S. pombe</i> putative amino acid transporter (3367790; 1.2e <sup>-67</sup> to Pfam01490).                            | 6e <sup>-13</sup>   | Pfam01490 2e <sup>-16</sup> Amino acid transporter                                                |
| PFL0420w                                                                                 | 12 | Hypothetical protein                                                   | 1564 | 10/11 | <i>D. discoideum</i> hypothetical protein (28828536; 3e <sup>-04</sup> to Pfam01490).                                   | 3e <sup>-28</sup>   | Pfam01490 7e <sup>-11</sup> Amino acid transporter                                                |
| PFL1515c*                                                                                | 12 | Hypothetical protein                                                   | 1936 | 9/10  | <b>PFL0420w</b> (23496616).                                                                                             | 2.1e <sup>-52</sup> | Pfam01490 4e <sup>-04</sup> Amino acid transporter                                                |
| <b>Ca<sup>2+</sup>: CATION ANTIPORTER FAMILY (TC 2.A.19; KOG1397)</b>                    |    |                                                                        |      |       |                                                                                                                         |                     |                                                                                                   |
| MAL6P1.38                                                                                | 6  | Calcium antiporter, putative                                           | 441  | 11/10 | <i>N. crassa</i> putative Ca <sup>2+</sup> :H <sup>+</sup> antiporter (32413763; 3e <sup>-86</sup> to KOG1397).         | 2e <sup>-73</sup>   | KOG1397 3e <sup>-65</sup> Ca <sup>2+</sup> :H <sup>+</sup> antiporter                             |
| <b>INORGANIC PHOSPHATE TRANSPORTER FAMILY (TC 2.A.20; PFAM01384)</b>                     |    |                                                                        |      |       |                                                                                                                         |                     |                                                                                                   |
| MAL13P1.206                                                                              | 13 | Phosphate transporter, putative                                        | 687  | 10/11 | <i>T. chui</i> high affinity phosphate transporter (28569257; 7.2e <sup>-143</sup> to Pfam01384).                       | 1.7e <sup>-95</sup> | Pfam01384 1.4e <sup>-114</sup> Na <sup>+</sup> -dependent P <sub>i</sub> transporter <sup>†</sup> |
| <b>NEUROTRANSMITTER:Na<sup>+</sup> SYMPORTER FAMILY (TC 2.A.22; PFAM00209, KOG3660)</b>  |    |                                                                        |      |       |                                                                                                                         |                     |                                                                                                   |
| PFB0435c<br>gi:16804986                                                                  | 2  | Predicted amine transporter<br>Hypothetical protein                    | 1138 | 14/11 | <i>D. melanogaster</i> hypothetical protein (24661428; 1e <sup>-163</sup> to KOG3660).                                  | 9e <sup>-16</sup>   | KOG3660 4e <sup>-25</sup><br>Pfam00209 2e <sup>-07</sup> Amino acid transporter                   |
| PFE0775c                                                                                 | 5  | Hypothetical protein                                                   | 960  | 14/15 | <b>PFB0435c</b> (7494357).                                                                                              | 3.5e <sup>-20</sup> | No matches Amino acid transporter                                                                 |
| PF11_0334<br>GlimmerM                                                                    | 11 | Hypothetical protein                                                   | 1439 | 15/14 | <i>H. sapien</i> GABA transporter (4507039; 0.0 to Pfam00209).                                                          | 6e <sup>-06</sup>   | Pfam00209 1.3e <sup>-05</sup> Amino acid transporter                                              |

|                                                                                      |    |                                                     |      |       |                                                                                                                                                                                            |                     |                             |                                                                           |
|--------------------------------------------------------------------------------------|----|-----------------------------------------------------|------|-------|--------------------------------------------------------------------------------------------------------------------------------------------------------------------------------------------|---------------------|-----------------------------|---------------------------------------------------------------------------|
| <b>MONOVALENT CATION:H<sup>+</sup> ANTIPORTER-1 FAMILY</b> (TC 2.A.36; Pfam00999)    |    |                                                     |      |       |                                                                                                                                                                                            |                     |                             |                                                                           |
| PF13_0019                                                                            | 13 | Na <sup>+</sup> :H <sup>+</sup> exchanger, putative | 1920 | 14    | <b>C. parvum putative Na<sup>+</sup>:H<sup>+</sup> antiporter</b> (32398656; 1.4e <sup>-48</sup> to Pfam00999).                                                                            | 2e <sup>-64</sup>   | Pfam00999 3e <sup>-28</sup> | Na <sup>+</sup> :H <sup>+</sup> antiporter                                |
| <b>FORMATE-NITRITE TRANSPORTER FAMILY</b> (TC 2.A.44; COG2116)                       |    |                                                     |      |       |                                                                                                                                                                                            |                     |                             |                                                                           |
| PFC0725c                                                                             | 3  | Transporter, putative                               | 309  | 6/7   | <b>B. anthracis putative formate-nitrite transporter</b> (21401706; 2e <sup>-50</sup> to COG2116).                                                                                         | 5e <sup>-25</sup>   | COG2116 4e <sup>-35</sup>   | Formate-nitrite transporter                                               |
| <b>SULPHATE PERMEASE FAMILY</b> (TC 2.A.53; COG0659)                                 |    |                                                     |      |       |                                                                                                                                                                                            |                     |                             |                                                                           |
| PF14_0679                                                                            | 14 | Sulphate transporter, putative                      | 664  | 11    | <b>V. cholerae putative sulphate permease</b> (9656576; 7e <sup>-90</sup> to COG0659).                                                                                                     | 7.2e <sup>-66</sup> | COG0659 7e <sup>-37</sup>   | Inorganic anion exchanger                                                 |
| <b>METAL ION (Mn<sup>2+</sup>-IRON) TRANSPORTER FAMILY</b> (TC 2.A.55; KOG1291)      |    |                                                     |      |       |                                                                                                                                                                                            |                     |                             |                                                                           |
| PFE1185w                                                                             | 5  | Transporter, putative                               | 684  | 11    | <b>A. thaliana NRAMP metal ion transporter 4</b> (15240711; 2e <sup>-169</sup> to KOG1291).                                                                                                | 9e <sup>-52</sup>   | KOG1291 5e <sup>-59</sup>   | Divalent cation (metal) :H <sup>+</sup> symporter                         |
| <b>EQUILIBRATIVE NUCLEOSIDE TRANSPORTER FAMILY</b> (TC 2.A.57; KOG1479)              |    |                                                     |      |       |                                                                                                                                                                                            |                     |                             |                                                                           |
| PFA0160c                                                                             | 1  | Integral membrane protein                           | 460  | 11    | <b>MAL8P1.32</b> (23612771) shares limited similarity in sequence with PFA0160c and is a structural homolog of this protein.                                                               | 0.38                | No matches                  | Nucleoside transporter                                                    |
| MAL8P1.32                                                                            | 8  | Nucleoside transporter, putative                    | 585  | 10/11 | <b>PF13_0252 PFENT1</b> (7688921).                                                                                                                                                         | 4e <sup>-12</sup>   | No matches                  | Nucleoside transporter                                                    |
| PF13_0252                                                                            | 13 | Nucleoside transporter 1                            | 422  | 9/10  | <b>T. gondii putative adenosine transporter</b> (6062551; 2e <sup>-11</sup> to KOG1479).                                                                                                   | 3.1e <sup>-11</sup> | KOG1479 2e <sup>-05</sup>   | Nucleoside transporter 1 (PFENT1; [62, 63])                               |
| PF14_0662                                                                            | 14 | Hypothetical protein                                | 437  | 11    | The <b>D. melanogaster hypothetical protein</b> (24580625; 5e <sup>-78</sup> to KOG1479) shares limited similarity in sequence with PF14_0662 and is a structural homolog of this protein. | 0.037               | KOG1479 3e <sup>-11</sup>   | Nucleoside transporter                                                    |
| <b>MULTI ANTIMICROBIAL EXTRUSION (MATE) FAMILY</b> (TC 2.A.66.1; COG0534)            |    |                                                     |      |       |                                                                                                                                                                                            |                     |                             |                                                                           |
| PFB0580w                                                                             | 2  | Hypothetical protein                                | 1224 | 11/10 | <b>A. fumigatus putative multidrug:Na<sup>+</sup> antiporter</b> (21627817; 1e <sup>-60</sup> to COG0534).                                                                                 | 7e <sup>-08</sup>   | COG0534 6e <sup>-07</sup>   | MATE antiporter                                                           |
| <b>VOLTAGE-GATED ION CHANNEL SUPERFAMILY</b> (TC 1.A.1; KOG1420, KOG4390)            |    |                                                     |      |       |                                                                                                                                                                                            |                     |                             |                                                                           |
| PFL1315w                                                                             | 12 | Hypothetical protein                                | 1979 | 8/10  | <b>Nostoc sp putative ion transporter</b> (17232125; 3e <sup>-15</sup> to KOG4390 and 4e <sup>-08</sup> to KOG1420).                                                                       | 5e <sup>-18</sup>   | KOG1420 4e <sup>-09</sup>   | K <sup>+</sup> channel                                                    |
| PF14_0342*                                                                           | 14 | Hypothetical protein                                | 1898 | 5/12  | <b>PFL1315w</b> (AAN36349).                                                                                                                                                                | 2.2e <sup>-58</sup> | No matches                  | Ion channel                                                               |
| PF14_0622                                                                            | 14 | Hypothetical protein                                | 1495 | 9/11  | <b>Nostoc sp putative ion transporter</b> (17232125).                                                                                                                                      | 3e <sup>-08</sup>   | KOG1420 3e <sup>-06</sup>   | K <sup>+</sup> channel                                                    |
| <b>ATP-BINDING CASSETTE (ABC) SUPERFAMILY</b> (TC 3.A.1; KOG0059, COG1129)           |    |                                                     |      |       |                                                                                                                                                                                            |                     |                             |                                                                           |
| PFC0875w                                                                             | 3  | Hypothetical protein                                | 3032 | 12/14 | <b>D. discoideum putative ABC transporter</b> (19110836; 1e <sup>-65</sup> to KOG0059).                                                                                                    | 4.5e <sup>-16</sup> | COG1129 6e <sup>-14</sup>   | ABC transporter                                                           |
| <b>MHC PEPTIDE TRANSPORTER (TAP) FAMILY</b> (TC 3.A.1.209 (DPL); KOG0058)            |    |                                                     |      |       |                                                                                                                                                                                            |                     |                             |                                                                           |
| PFC0125w*. <sup>‡</sup>                                                              | 3  | ABC transporter, putative                           | 1365 | 6     | <b>C. tepidum putative ABC transporter</b> (21674321; 1e <sup>-105</sup> to KOG0058).                                                                                                      | 3e <sup>-22</sup>   | KOG0058 4e <sup>-23</sup>   | ABC transporter (TAP family)                                              |
| PF11_0466*                                                                           | 11 | Transport protein, putative                         | 872  | 8     | <b>D. rerio putative TAP protein</b> (26788076; 7e <sup>-142</sup> to KOG0058).                                                                                                            | 9e <sup>-32</sup>   | KOG0058 7e <sup>-37</sup>   | ABC transporter (TAP family)                                              |
| PFL0495c <sup>‡</sup>                                                                | 12 | ABC transporter, putative                           | 855  | 5/6   | <b>H. sapien putative MDR/TAP protein</b> (9961244; 0.0 to KOG0058).                                                                                                                       | 1e <sup>-45</sup>   | KOG0058 8e <sup>-67</sup>   | ABC transporter (TAP family)                                              |
| <b>MULTIDRUG RESISTANCE EXPORTER (MDR) FAMILY</b> (TC 3.A.1.201 (DPL); KOG0055)      |    |                                                     |      |       |                                                                                                                                                                                            |                     |                             |                                                                           |
| PFE1150w                                                                             | 5  | Multidrug resistance protein                        | 1419 | 11    | <b>R. norvegicus putative multidrug/pheromone exporter Mdr1a</b> (25453402; 0.0 to KOG0055).                                                                                               | e <sup>-154</sup>   | KOG0055 0.0                 | Multidrug resistance protein (MDR family) (PfMDR1; [124, 125])            |
| PF13_0218 <sup>‡</sup>                                                               | 13 | ABC transporter, putative                           | 925  | 4/6   | <b>S. histriomuscorum putative ABC transporter</b> (13346110; 2e <sup>-140</sup> to KOG0055).                                                                                              | 3e <sup>-21</sup>   | KOG0055 2e <sup>-22</sup>   | ABC transporter (MDR family)                                              |
| <b>HEAVY METAL TRANSPORTER (HMT) FAMILY</b> (TC 3.A.1.210 (DPL); KOG0056, KOG0057)   |    |                                                     |      |       |                                                                                                                                                                                            |                     |                             |                                                                           |
| PF13_0271*. <sup>‡</sup>                                                             | 13 | ABC transporter, putative                           | 1049 | 5/6   | <b>A. thaliana putative ABC transporter</b> (15237155; 0.0 to KOG0057).                                                                                                                    | 7e <sup>-59</sup>   | KOG0057 2e <sup>-41</sup>   | ABC transporter (HMT family)                                              |
| PF14_0455                                                                            | 14 | Multidrug resistance protein 2                      | 1024 | 10/11 | <b>C. elegans ABC transporter required for heavy metal detoxification</b> (25150042; 0.0 to KOG0056).                                                                                      | e <sup>-112</sup>   | KOG0056 4e <sup>-109</sup>  | Multidrug resistance protein 2 (HMT family) (PfMDR2; [126])               |
| <b>CONJUGATE TRANSPORTER (CT) FAMILY</b> (TC 3.A.1.208 (OAD); KOG0054)               |    |                                                     |      |       |                                                                                                                                                                                            |                     |                             |                                                                           |
| PFA0590w                                                                             | 1  | ABC transporter, putative                           | 1822 | 11/13 | <b>PFL1410c</b> (23508976).                                                                                                                                                                | e <sup>-160</sup>   | KOG0054 4e <sup>-45</sup>   | ABC transporter (CT family) (PfMRP; [127])                                |
| PFL1410c                                                                             | 12 | Hypothetical protein                                | 2108 | 11/17 | <b>PFA0590w</b> (23613477).                                                                                                                                                                | e <sup>-164</sup>   | KOG0054 2e <sup>-22</sup>   | ABC transporter (CT family)                                               |
| <b>EYE PIGMENT PRECURSOR TRANSPORTER (EPP) FAMILY</b> (TC 3.A.1.204 (EPD); KOG0061)  |    |                                                     |      |       |                                                                                                                                                                                            |                     |                             |                                                                           |
| PF14_0244 <sup>‡</sup>                                                               | 14 | ABC transporter, putative                           | 660  | 6     | <b>A. thaliana putative ABC transporter</b> (18415230; 3e <sup>-131</sup> to KOG0061).                                                                                                     | 4e <sup>-71</sup>   | KOG0061 2e <sup>-59</sup>   | ABC transporter (EPP family)                                              |
| <b>P-TYPE ATPASE (P-ATPASE) SUPERFAMILY</b> (TC 3.A.3; KOG0202, KOG0204, KOG0206-10) |    |                                                     |      |       |                                                                                                                                                                                            |                     |                             |                                                                           |
| PFA0310c                                                                             | 1  | Calcium-transporting ATPase                         | 1228 | 8/11  | <b>L. esculentum Ca<sup>2+</sup>-transporting P-type ATPase LCA1</b> (170378; 0.0 to KOG0202).                                                                                             | e <sup>-154</sup>   | KOG0202 3e <sup>-169</sup>  | SERCA-type Ca <sup>2+</sup> -transporting P-ATPase (PfATPase6; [128-130]) |

|                                                                                  |    |                                                                |      |       |                                                                                                                       |               |           |               |                                                                                                           |
|----------------------------------------------------------------------------------|----|----------------------------------------------------------------|------|-------|-----------------------------------------------------------------------------------------------------------------------|---------------|-----------|---------------|-----------------------------------------------------------------------------------------------------------|
| PFL0590c                                                                         | 12 | P-type ATPase, putative                                        | 1208 | 8     | <i>M. barkeri</i> putative cation-transporting P-type ATPase (23051256; 0.0 to KOG0202).                              | $e^{-125}$    | KOG0202   | $4e^{-152}$   | Non-SERCA-type $Ca^{2+}$ -transporting P-ATPase (PfATPase4; [130, 131])                                   |
| MAL13P1.246                                                                      | 13 | Hypothetical protein                                           | 1828 | 9/11  | <i>T. gondii</i> $Ca^{2+}$ -transporting P-type ATPase (8100498; $5e^{-140}$ to KOG0204).                             | $1e^{-11}$    | KOG0204   | $6e^{-06}$    | Cation-transporting P-ATPase                                                                              |
| PFI0240c                                                                         | 9  | E1-E2_ATPase/ hydrolase putative                               | 2563 | 6/10  | <i>C. parvum</i> putative $Cu^{2+}$ -transporting P-type ATPase (10122140; $2e^{-36}$ to KOG0207).                    | $1e^{-29}$    | KOG0207   | $2e^{-28}$    | $Cu^{2+}$ -transporting P-ATPase (PfCuP-ATPase; [132])                                                    |
| PFE0195w                                                                         | 5  | P-type ATPase, putative                                        | 2393 | 12/14 | <i>C. parum</i> putative $Ca^{2+}$ -transporting P-type ATPase (7021535; $5e^{-36}$ to KOG0208).                      | $2e^{-40}$    | KOG0208   | $2e^{-41}$    | Cation-transporting P-ATPase (PfATPase3; [133])                                                           |
| PFE0805w*                                                                        | 5  | Cation-transporting ATPase 1                                   | 2400 | 10/12 | <i>M. musculus</i> putative cation-transporting P-type ATPase (31982093; 0.0 to KOG0208).                             | $4e^{-40}$    | KOG0208   | $3e^{-44}$    | Cation-transporting P-ATPase (PfATPase1; [134])                                                           |
| PF07_0115*                                                                       | 7  | Integral membrane protein, putative                            | 1918 | 12/13 | <i>A. gambiae</i> hypothetical protein (31223925; 0.0 to KOG0209).                                                    | $8e^{-56}$    | KOG0209   | $4e^{-62}$    | Cation-transporting P-ATPase                                                                              |
| PF11_0395                                                                        | 11 | Guanylyl cyclase                                               | 4226 | 19/24 | <i>A. thaliana</i> putative phospholipid-transporting P-type ATPase II (15222212; 0.0 to KOG0206).                    | $3e^{-60}$    | KOG0206   | $2e^{-80}$    | Protein with aminophospholipid-transporting P-ATPase and guanylyl cyclase domains                         |
| PF13_0320                                                                        | 13 | Guanylyl cyclase                                               | 3127 | 21/22 | <b>PF11_0395</b> (23508585).                                                                                          | $3e^{-53}$    | KOG0206   | $3e^{-23}$    | Protein with aminophospholipid-transporting P-ATPase and guanylyl cyclase domains                         |
| PFC0840w                                                                         | 3  | P-type ATPase, putative                                        | 1864 | 10/11 | <i>A. gambiae</i> hypothetical protein (31206633; $4e^{-134}$ to KOG0206).                                            | $2e^{-61}$    | KOG0206   | $4e^{-62}$    | Aminophospholipid-transporting P-ATPase (PfATPase7; [135])                                                |
| PFL0950c                                                                         | 12 | P-type ATPase2                                                 | 1555 | 10/11 | <i>D. discoideum</i> hypothetical protein (28850447; 0.0 to KOG0206).                                                 | $e^{-100}$    | KOG0206   | $8e^{-134}$   | Aminophospholipid-transporting P-ATPase (PfATPase2; [136])                                                |
| PFL1125w                                                                         | 12 | Phospholipid-transporting ATPase, putative                     | 1618 | 10    | <i>M. musculus</i> putative phospholipid-transporting P-type ATPase IIB (29839753; 0.0 to KOG0202).                   | $e^{-114}$    | KOG0210   | $3e^{-104}$   | Aminophospholipid-transporting P-ATPase                                                                   |
| PF14_0654                                                                        | 14 | Hypothetical protein                                           | 1837 | 6/8   | <b>PFL1125w</b> (23508919).                                                                                           | $4.8e^{-33}$  | KOG0210   | $4e^{-08}$    | Aminophospholipid-transporting P-ATPase                                                                   |
| <b>H<sup>+</sup>-TRANSLOCATING PYROPHOSPHATASE FAMILY (TC 3.A.10; PFAM03030)</b> |    |                                                                |      |       |                                                                                                                       |               |           |               |                                                                                                           |
| PFL1700c                                                                         | 12 | V-type H <sup>+</sup> -translocating inorganic pyrophosphatase | 1044 | 16    | <i>A. thaliana</i> vacuolar-type H <sup>+</sup> -translocating inorganic pyrophosphatase (6901676; 0.0 to Pfam03030). | $1.1e^{-226}$ | Pfam03030 | $9.2e^{-247}$ | V-type K <sup>+</sup> -independent H <sup>+</sup> -translocating inorganic pyrophosphatase (PfVPP2; [23]) |
| PF14_0541                                                                        | 14 | V-type H <sup>+</sup> -translocating pyrophosphatase, putative | 717  | 16/15 | <i>T. gondii</i> H <sup>+</sup> -translocating inorganic pyrophosphatase 1 (6901676; 0.0 to Pfam03030).               | 0.0           | Pfam03030 | 0.0           | V-type K <sup>+</sup> -dependent H <sup>+</sup> -translocating inorganic pyrophosphatase (PfVPP1; [23])   |

<sup>a</sup> Italics indicate where an alternate gene model was used in place of the Gardner et al. (2002) [3] version. Gene products were assigned to a known transport family according to the official transporter classification system [10]. The Transport Commission (TC) number and examples of conserved domains of the family are shown in parentheses. Abbreviations are as follows: COG, clusters of orthologous groups of proteins from prokaryotes and unicellular eukaryotes [137]; KOG, clusters of orthologous groups of proteins from eukaryotes [138]; Pfam, protein families and domains [139]; DPL, drugs, peptides, lipids; OAD, organic anion conjugates, anions, drugs; EPD, eye pigment precursors and drugs.

<sup>b</sup> Chromosome on which the gene is located.

<sup>c</sup> For some chromosome 2 proteins the annotation given by Gardner et al. (2002) [3] differed from that of Gardner et al. (1998) [140], in which case the 2002 annotation is listed first and the 1998 second.

<sup>d</sup> Amino acid residues.

<sup>e</sup> Number of transmembrane domains predicted to be present in the protein. Each protein was analysed by the TMHMM2 and TMPRED programs and where the outputs from the two programs were dissimilar, the predicted number of transmembrane domains were tabulated as TMHMM2/Tmpred.

<sup>f</sup> The (non-*P. yoelii*) protein that was retrieved with the highest sequence similarity to the *P. falciparum* protein in a BLASTP search of the NCBI non-redundant protein database. The NCBI (gi) accession number and the best match to a conserved domain for the retrieved protein are given in parentheses. Abbreviations are as follows: MFS, major facilitator superfamily; NRAMP, 'natural resistance-associated' macrophage protein.

<sup>g</sup> The 'E' value is the expectation that the sequence similarity shared by the *P. falciparum* protein and the protein identified in the Table as its 'Closest BLAST homologue' arose by chance. An 'E' value  $< 10^{-04}$  is considered to indicate a significant sequence similarity between the two proteins, consistent with their having a related biological function.

<sup>h</sup> E value for the best conserved domain match to the *P. falciparum* protein. (p) indicates that the match is only putative as the E value is  $= 10^{-03}$ .

<sup>i</sup> Functions have been assigned (tentatively) on the basis of the specificity and transport mechanism (proven or postulated) of related proteins as well as similarities to conserved domains.

\* These proteins are predicted to contain an apicoplast targeting signal ([14]; GO cellular component 'apicoplast (GO:0020011)'; PlasmoDB). None of the proteins presented in Tables 1-3 are predicted to be targeted to the mitochondria.

<sup>§</sup> These families are related to the MFS.

<sup>†</sup> R. Martin, K. Saliba, A. Bröer, C. McCarthy, M. Downie, R. Henry, R. Allen, S. Bröer and K. Kirk, manuscript in preparation.

<sup>‡</sup> These putative ABC transport proteins were not retrieved by the hydrophathy-based approach, but have been included to complete the overview of ABC transport proteins in *P. falciparum*.
