# Supplementary material for: The 'permeome' of the malaria parasite: an overview of the membrane transport proteins of Plasmodium falciparum
Source: PubMed Central journal article supplement (PMC1088945; doi:10.1186/gb-2005-6-3-r26), 2005-03-02
Supplement: gb-2005-6-3-r26-S8.pdf [file gb-2005-6-3-r26-S8.pdf]

# NEUROTRANSMITTER:Na<sup>+</sup> SYMPORTER FAMILY

Neurotransmitters & other solutes

1. *B. taurus* 4588918 serotonin
2. *H. sapiens* 4507041 dopamine
3. *R. catesbeiana* 2342870 L-epinephrine
4. *H. sapiens* 40254467 CAT-1 GABA
5. *O. cuniculus* 400621 GT1 creatine
6. *H. sapiens* 4507045 taurine
7. *T. marmorata* 2133806 GABA/beta-alanine

Amino acids

8. *A. gambiae* 31220902 unknown
9. *M. sexta* 33115052 proline
10. **PF11\_0334**
11. *H. sapiens* 7657589 proline
12. *H. sapiens* 41018156 ATB0<sup>+</sup> amino acids
13. *H. sapiens* 17380317 GlyT2 glycine
14. **PFE0775c**
15. *M. musculus* 45822265 neutral amino acids
16. *A. gambiae* 23955262 amino acids (p)
17. *D. melanogaster* 30913427 unknown
18. *M. sexta* 3252836 KAAT1 amino acids
19. **PFB0435c**
20. *C. elegans* 17569475 unknown
21. *C. elegans* 17542050 unknown
22. *S. thermophilum* 21623782 tryptophan
23. *M. jannaschii* 15669509 unknown

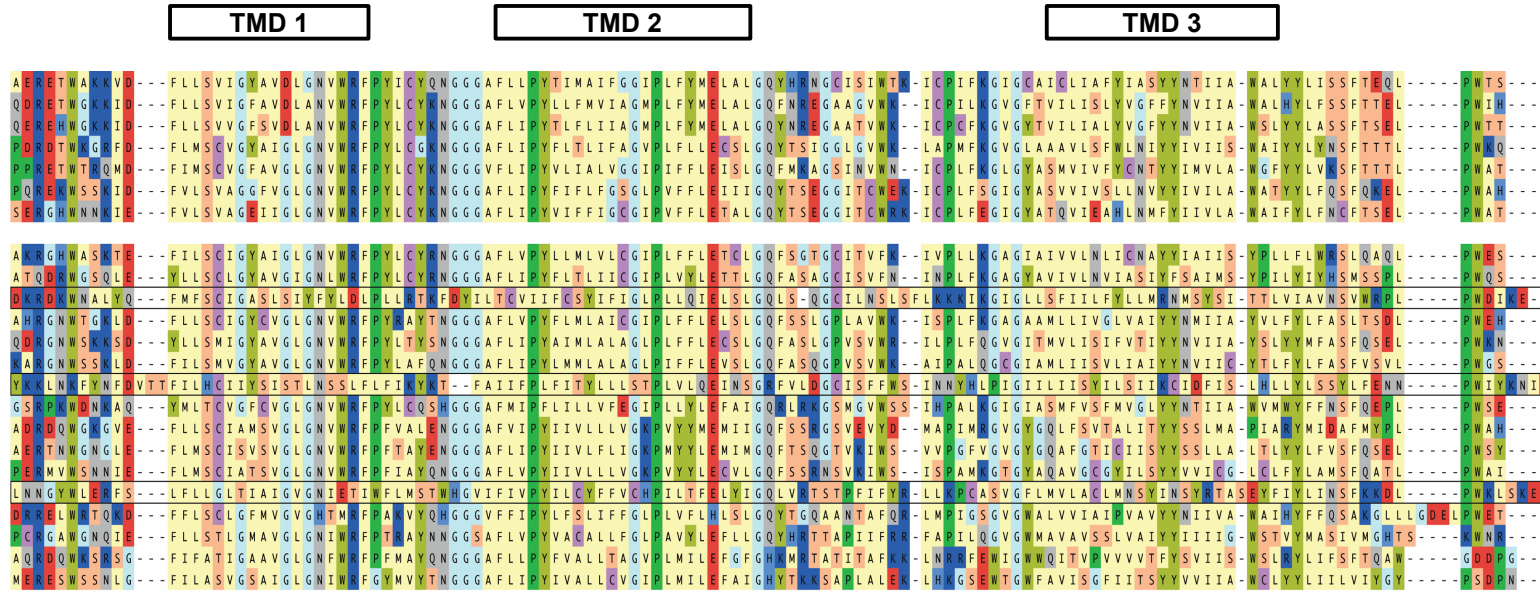

## NSS FAMILY ALIGNMENT CONTINUED ...

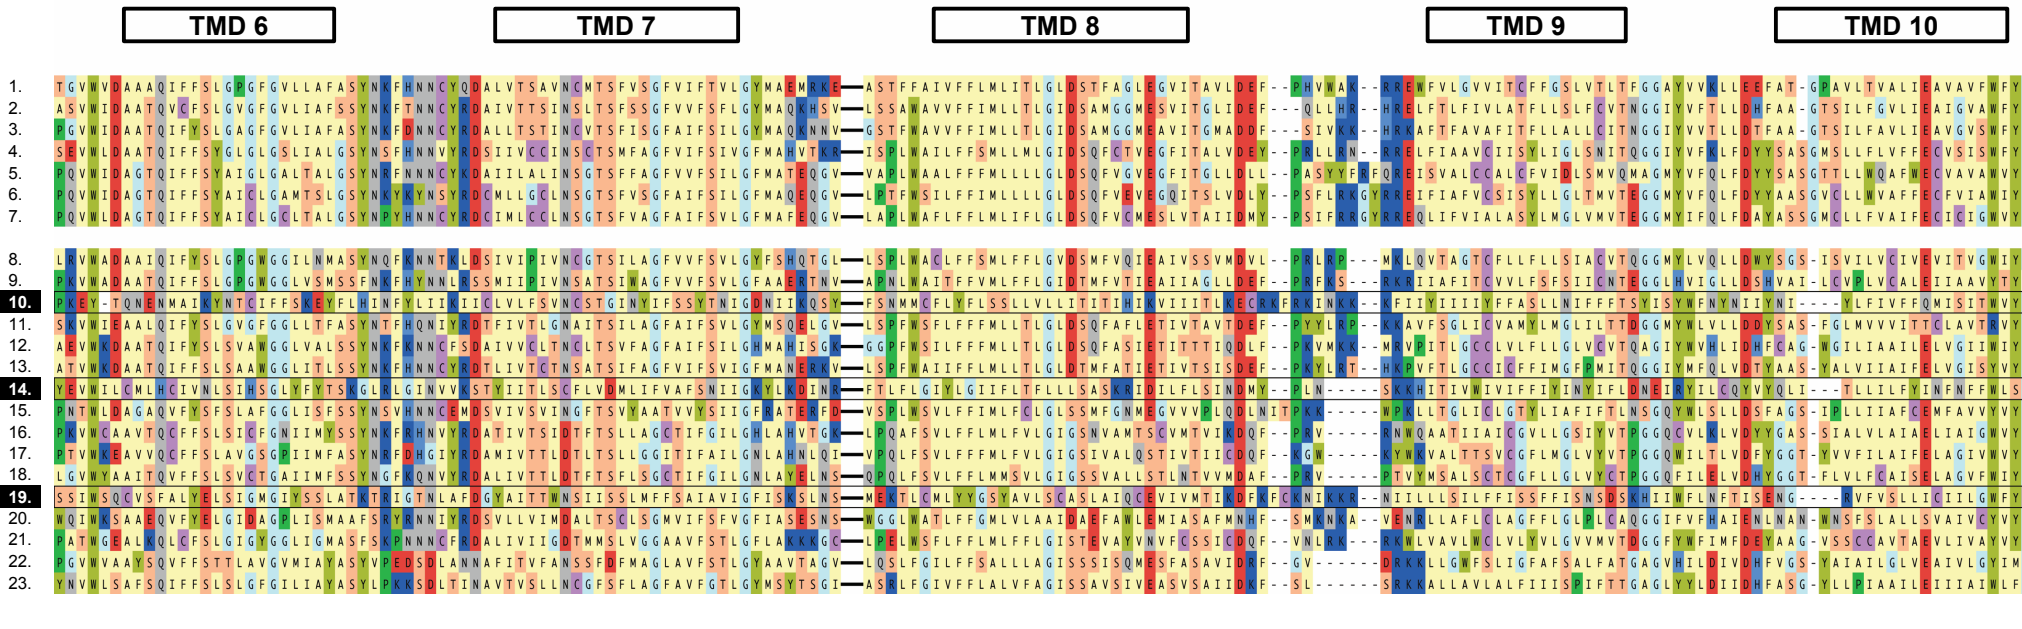

**Additional data file 8. The alignment of the *P. falciparum* putative neurotransmitter:Na<sup>+</sup> symporters with a representative selection of neurotransmitter:Na<sup>+</sup> symporters (known and putative) from other organisms.** The region over TMDs 1-3 and TMDs 6-10 of the alignment is shown. The sequences are separated into two clusters, one containing proteins known to transport neurotransmitters, creatine or taurine, and the other proteins known or hypothesized to transport amino acids. The *P. falciparum* proteins have diverged considerably from the other family members, but are perhaps most similar in sequence to the amino acid transporters. Legend as described for Additional data file 4.
