# Supplementary material for: The 'permeome' of the malaria parasite: an overview of the membrane transport proteins of Plasmodium falciparum
Source: PubMed Central journal article supplement (PMC1088945; doi:10.1186/gb-2005-6-3-r26), 2005-03-02
Supplement: gb-2005-6-3-r26-S9.pdf [file gb-2005-6-3-r26-S9.pdf]

# VOLTAGE-GATED ION CHANNEL SUPERFAMILY

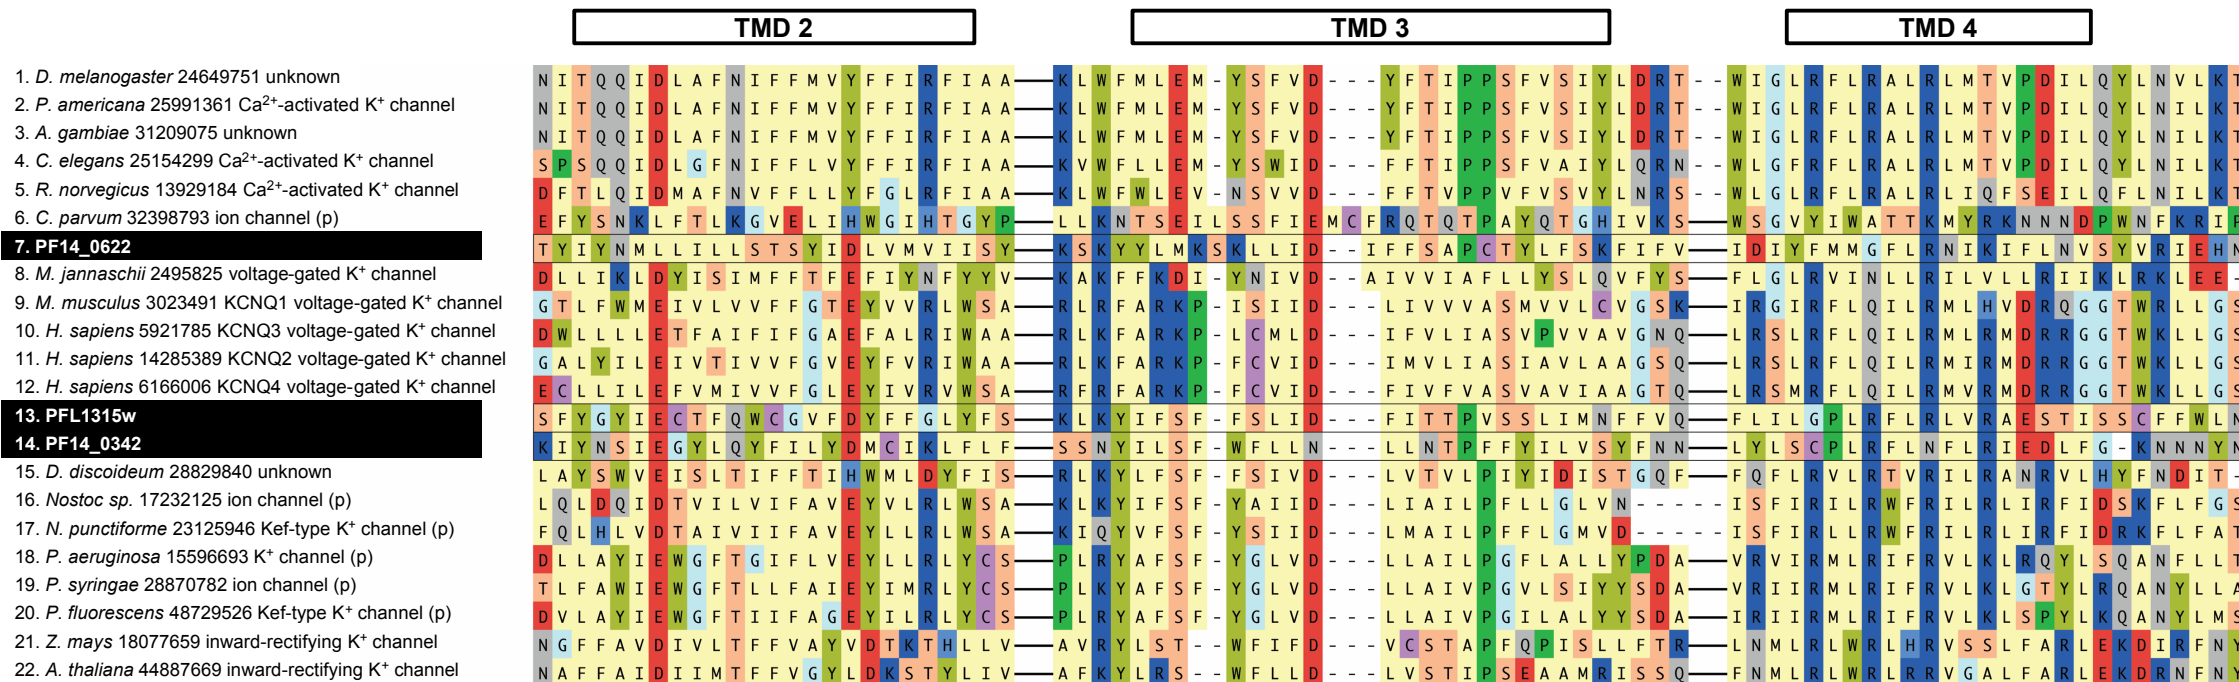

## VIC FAMILY ALIGNMENT CONTINUED ...

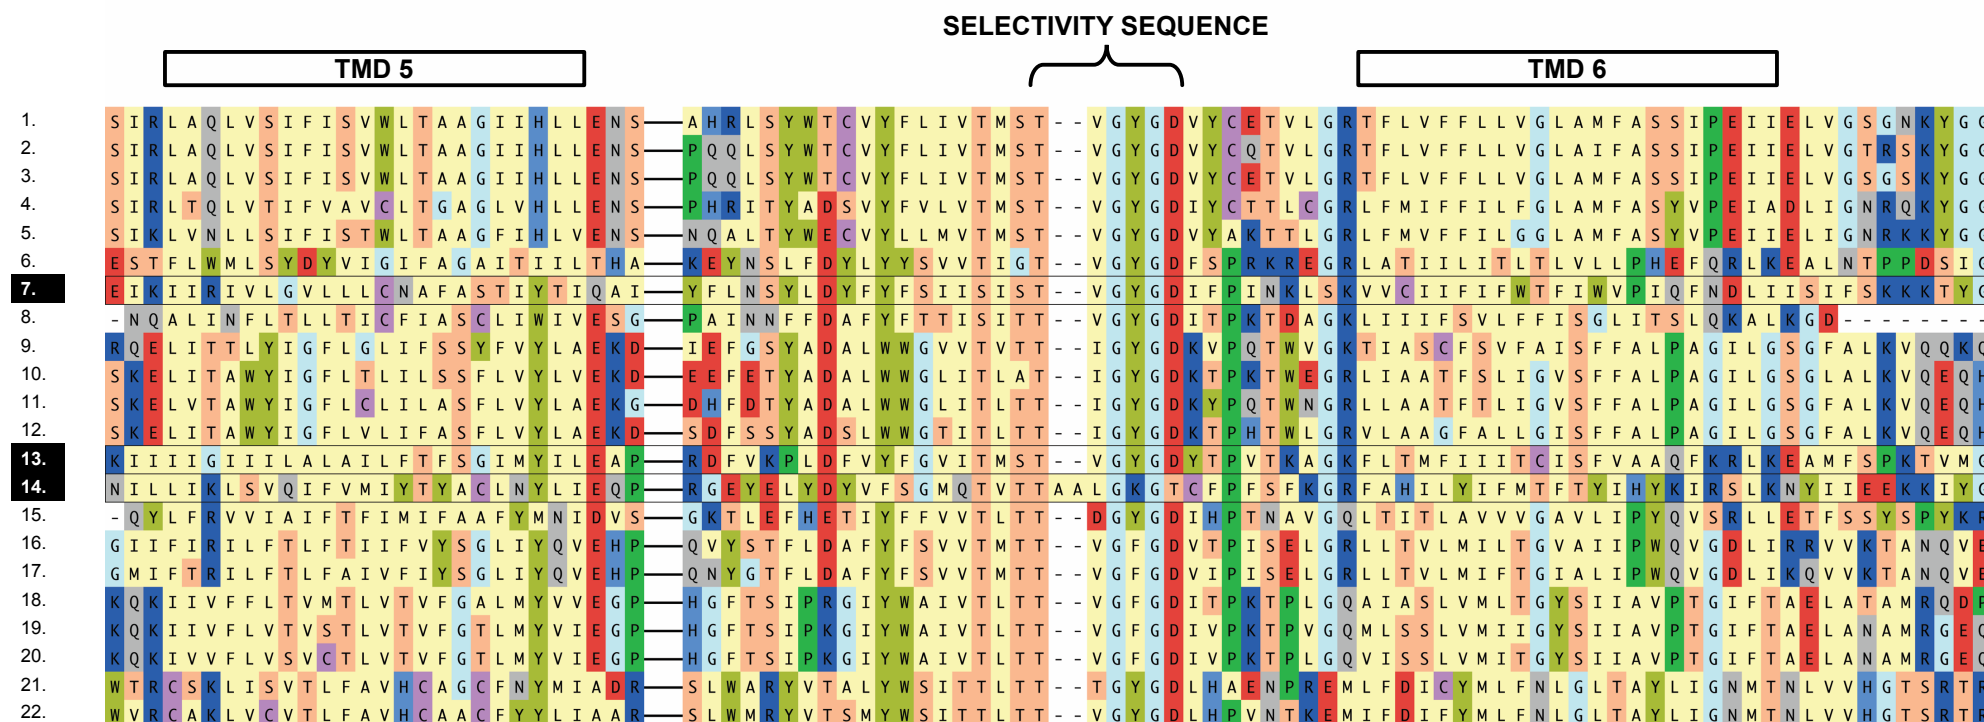

**Additional data file 9. The alignment of the putative *P. falciparum* K<sup>+</sup> channel proteins (PFL1315w and PF14\_0622) and novel ion channel protein (PF14\_0342) with a representative selection of K<sup>+</sup> channel proteins (known and putative) of the voltage-gated ion channel superfamily from other organisms.** The region over TMDs 2-6 of the alignment is shown. The locations of the 'voltage sensor' and 'selectivity sequence' are indicated. Legend as described for Additional data file 4.
