# Supplementary material for: The 'permeome' of the malaria parasite: an overview of the membrane transport proteins of Plasmodium falciparum
Source: PubMed Central journal article supplement (PMC1088945; doi:10.1186/gb-2005-6-3-r26), 2005-03-02
Supplement: gb-2005-6-3-r26-S10.pdf [file gb-2005-6-3-r26-S10.pdf]

## **ADDITIONAL METHODS**

The *P. falciparum* genome was scanned using the following parameters:

Minimum Peptide Length = 250 amino acids

Maximum Peptide Length = 5000 amino acids

Smoothing Window Length = 19 amino acids

Peak Threshold = 1.4 hydrophathy units (Kyte-Doolittle)

Valley Threshold = 0.2

Maximum Location for First Peak = within first 1000 amino acids

Minimum Peak Width = 12 amino acids

Maximum Peak Width = 60 amino acids

Allow Merged Peaks = True

Minimum Number of Transmembrane Domains = 7

Maximum Number of Transmembrane Domains = 22

**Table 4:** List of primers used in this study.

| GENE        | SEQUENCE (5' to 3') <sup>a</sup>                         | PRODUCT SIZE (bp) |
|-------------|----------------------------------------------------------|-------------------|
| PFB0435c    | CAACTTTGCGTTCTCAGCAG (F)<br>TGTGAAGCCAACTGGAAAAA (R)     | 427               |
| PFE0775c    | CCGGACGTTTTGTATTAGATGG (F)<br>AAAGAAAGGAAGGAAGCGAGA (R)  | 400               |
| PF11_0334   | TGAGCCCAATACACTTGTTC (F)<br>TCACCAGCGTGGTTACTG (R)       | 458               |
| PFB0210c    | GAAGAATGGAAAGAGCGGATT (F)<br>ACACCATACGCACCCTTCTT (R)    | 453               |
| PFI0955w    | ATGTGCATAACGGCAACAAA (F)<br>TTCTCATATGCACCACAAA (R)      | 437               |
| PFI0785c    | TGGAGTTTGGTTTGGTGGAT (F)<br>TCATGGTGAATCCAGCTTTT (R)     | 386               |
| PFE1455w    | ATGATTGGTGTGGGTGGAAT (F)<br>CAATAAGCTGCACGACATGG (R)     | 447               |
| PFL0170w    | GCCGCAAGTATGGAAGGTAA (F)<br>AAATCCAGGCCCTTCTCATT (R)     | 377               |
| MAL6P1.133  | CCAAAAAGAAATTGGAAGGG (F)<br>TTTGTGAATAAGGTCGGGAAA (R)    | 398               |
| PFL0420w    | TGTTTTGGTTATACAATCGTTTTG (F)<br>TTCATTTCAATTTGCCAACA (R) | 430               |
| PFL1515c    | GGAATGTGTTCTGTGTTTCG (F)<br>AGATGAAATAGGGGAAGGGTCT (R)   | 497               |
| MAL8P1.13   | TGGCCATGTTTCAATCATTAG (F)<br>TTGGGAATGGTTTGGTAGGA (R)    | 473               |
| PF10_0215   | AGTTGGCCGCATTCATAAT (F)<br>GCACAGGTTGTTAGGAATGAAA (R)    | 440               |
| PF11_0172   | CCATCGTTTATGGGGACATT (F)<br>TTTCGATGTCTCCTCGTTT (R)      | 499               |
| PFB0465c    | GCCAGATTATATGCCCGAAA (F)<br>TCCCCAAAAGATCCTACCAA (R)     | 490               |
| PFI1295c    | GGGAACAATGTGACCTACCG (F)<br>TTTCTTTTGGACAGGAGAGACA (R)   | 396               |
| PF13_0252   | TGGTGTAGTGGCAGGATTAGC (F)<br>TTTTGTGTCCAACACCTGGA (R)    | 410               |
| MAL8P1.32   | CCGTTTGTGTTCCAGAAAAT (F)<br>TGTGGAACATCCATAGCCTG (R)     | 423               |
| PFA0160c    | GAAAAGCGAGGAGATCCAGA (F)<br>CCATCTTCGATAGAAAAATACGA (R)  | 471               |
| PF14_0662   | TGATTGTATCGATGGCTGATT (F)<br>TTTCATTTTCATCATTGCGAAAA (R) | 422               |
| PFL1315w    | AAAAAGAGAAGCGCATTGTTG (F)<br>TACCATCCGTTTGGGATTTC (R)    | 381               |
| PF14_0622   | TCCGAATTGTTTTGGGTGTT (F)<br>TTTCCTTGTGCTACTGATTTCG (R)   | 400               |
| PF14_0342   | ATTAAGTTCCAGCCGCTTT (F)<br>TGATTCTTTCTCCGTATGTGC (R)     | 350               |
| PFA0240w    | TTCGGCCCTAAAATAACAGC (F)<br>ATGTGCCTCCATGGTAAAAA (R)     | 362               |
| PFA0245w    | TATACAGCGACCTCAGCGTG (F)<br>GCTGCAGCTCCTATAACGGT (R)     | 419               |
| PFC0530w    | TGTATTTGGGGAACATTGAA (F)<br>CCTTGAGCTATTGCCTTTGG (R)     | 402               |
| PFI0720w    | TTTGAATCTTGGGTTGAGC (F)<br>TTGTGGATGTGCCATAAAG (R)       | 450               |
| PF11_0310   | TCAAACCTGGGCTCAGTGGAT (F)<br>GATGCGTCGTCTCCATAGGT (R)    | 320               |
| PF14_0679   | ACGTTGGTGGTTTTGATCGT (F)<br>CACATTCAGCACCTCCATA (R)      | 397               |
| MAL13P1.206 | GCAACGTTTTGTTAGCTGT (F)<br>GAGCAGCACTCCAGTCTTCA (R)      | 406               |
| PFB0275w    | AGCGTTAGAAGCCGATTTGA (F)<br>AGGCAACGGTTGTTGTTACC (R)     | 374               |
| PF11_0059   | TGCTACCATGCTAGGACCATT (F)<br>AAAGAAACCTGAGCCCTTCC (R)    | 447               |
| PF14_0260   | CAGTTAGCTGGTTGTGTGCAA (F)<br>ACCACGGAAAAACAGTAAGC (R)    | 480               |
| PF14_0387   | GCGAAGGAAATACAAAAGCA (F)<br>TGAAGCAAATGCTGAAGTGA (R)     | 401               |
| β-Actin1    | GTTGTTGACAACGGATCAGG (F)<br>CCAGTGGTACGACCAGAAGAA (R)    | 425               |

<sup>a</sup> Forward primer (F) and reverse primer (R).
